# Supplementary material
Source: Springer Nature journal article supplement (https://www.springermedizin.de/resource/supplementary/13256_2011_1993_MOESM3_ESM.pdf/9649204)

60% tumoral cells

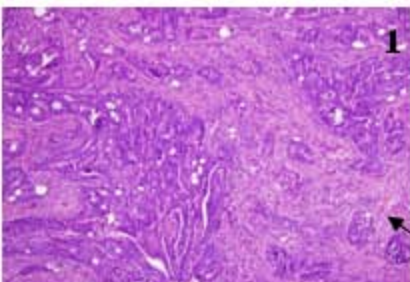

50% tumoral cells

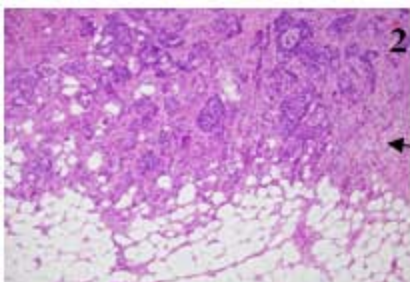

10% tumoral cells

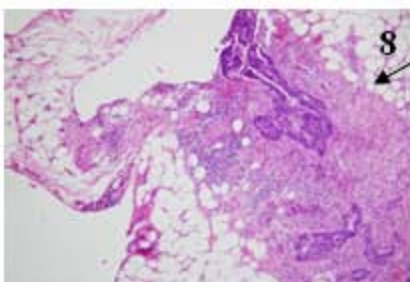

60% tumoral cells

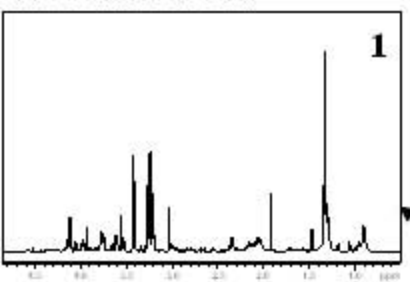

50% tumoral cells

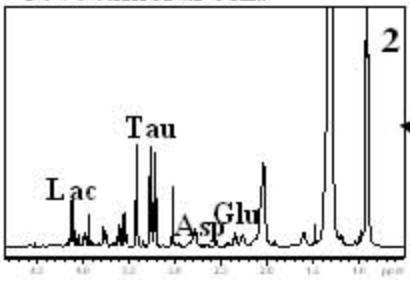

10% tumoral cells

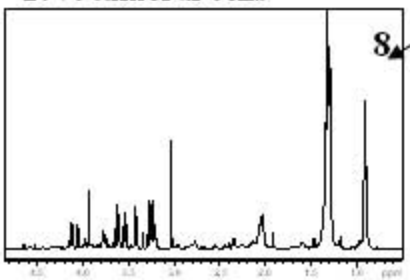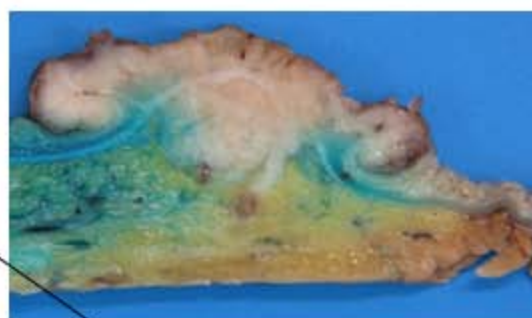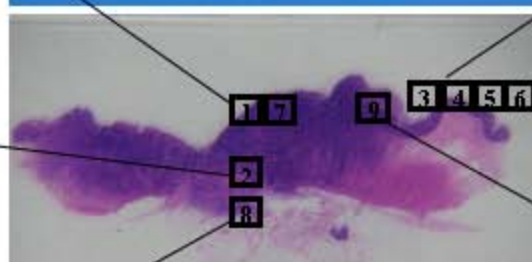

0% tumoral cells

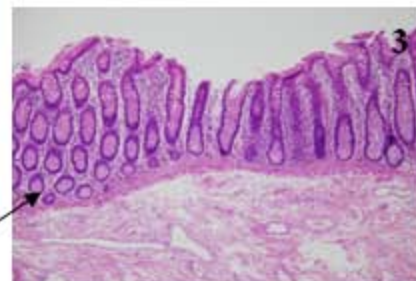

30% tumoral cells

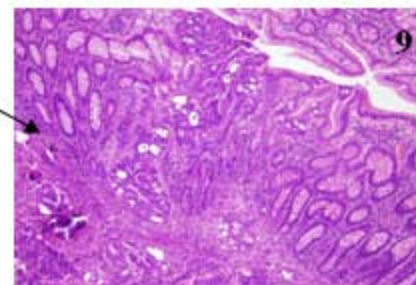

A

B

0% tumoral cells

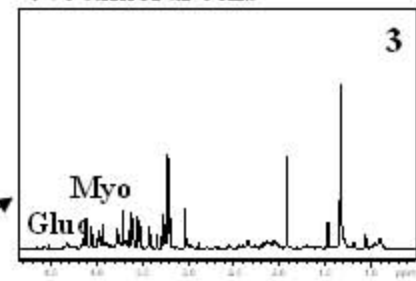

30% tumoral cells

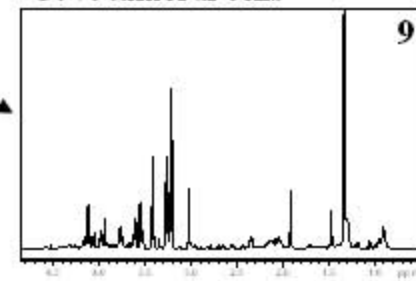

Supplement: MOESM3 [file 9649204]
